# Supplementary material
Source: PubMed Central journal article supplement (PMC8068632)
Supplement: NIHMS1678385-supplement-1.pdf [file NIHMS1678385-supplement-1.pdf]

**Appendix**  
**Adolescents' Patterns of Well-Care Use Over Time: Who Stays Connected**  
**Van Eck et al.**

**Appendix Figure 1.** Proportion of adolescents' well-care use over time by class and by sex with insurance as a time-varying covariate.

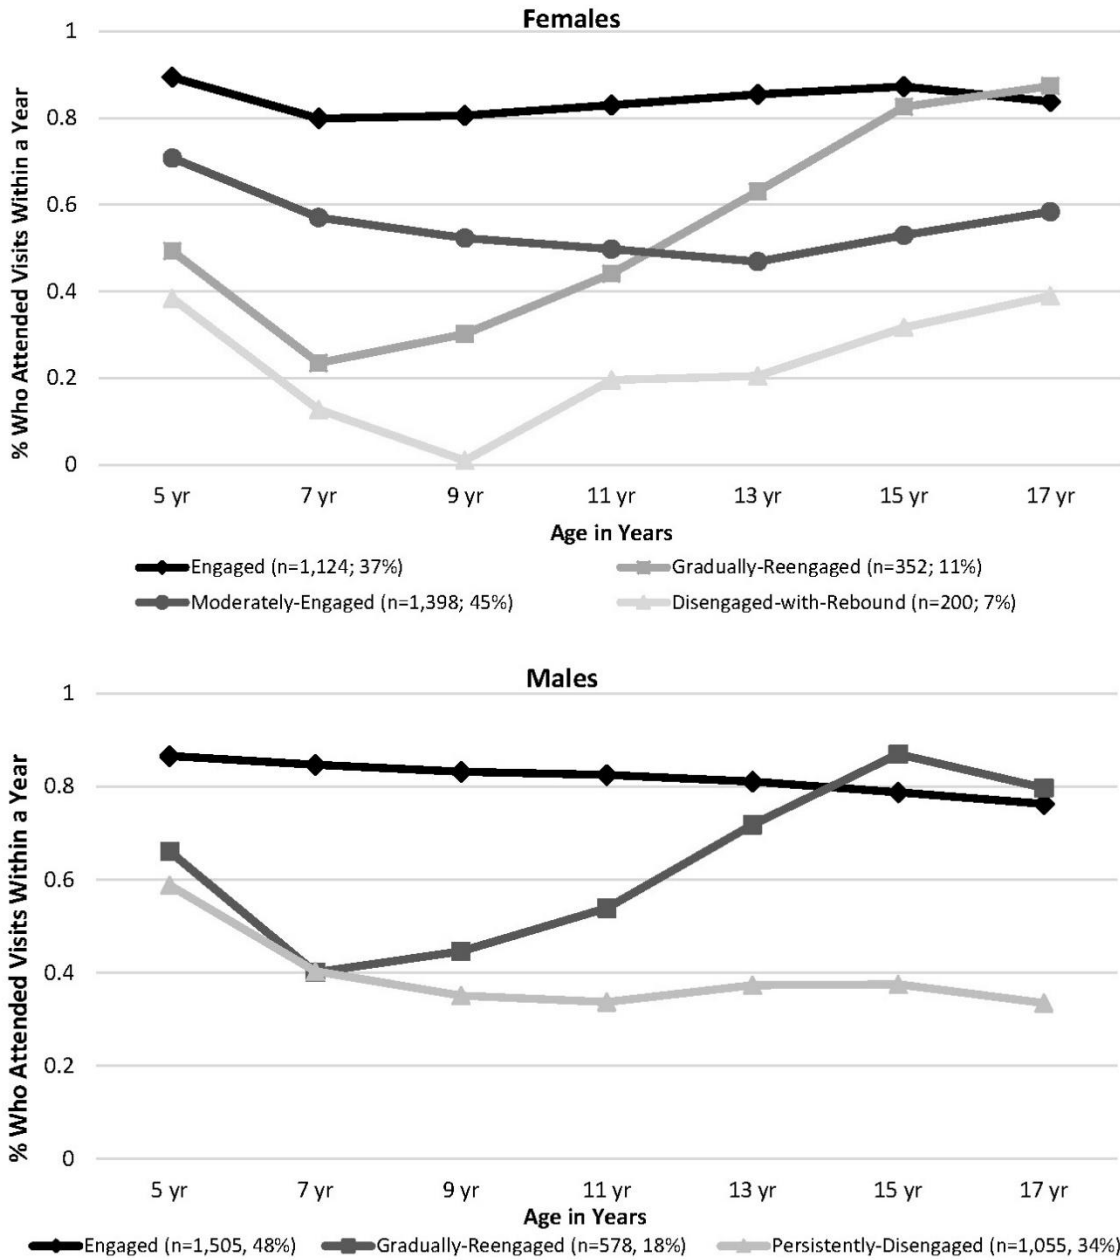

*Note:* These figures show the trajectories of well-care use by sex where insurance is included as a time-varying covariate.

**Appendix**  
**Adolescents' Patterns of Well-Care Use Over Time: Who Stays Connected**  
**Van Eck et al.**

**Appendix Figure 2.** Results of multinomial logistic regression of biennial cohort by adolescents' well-care use classes by sex.

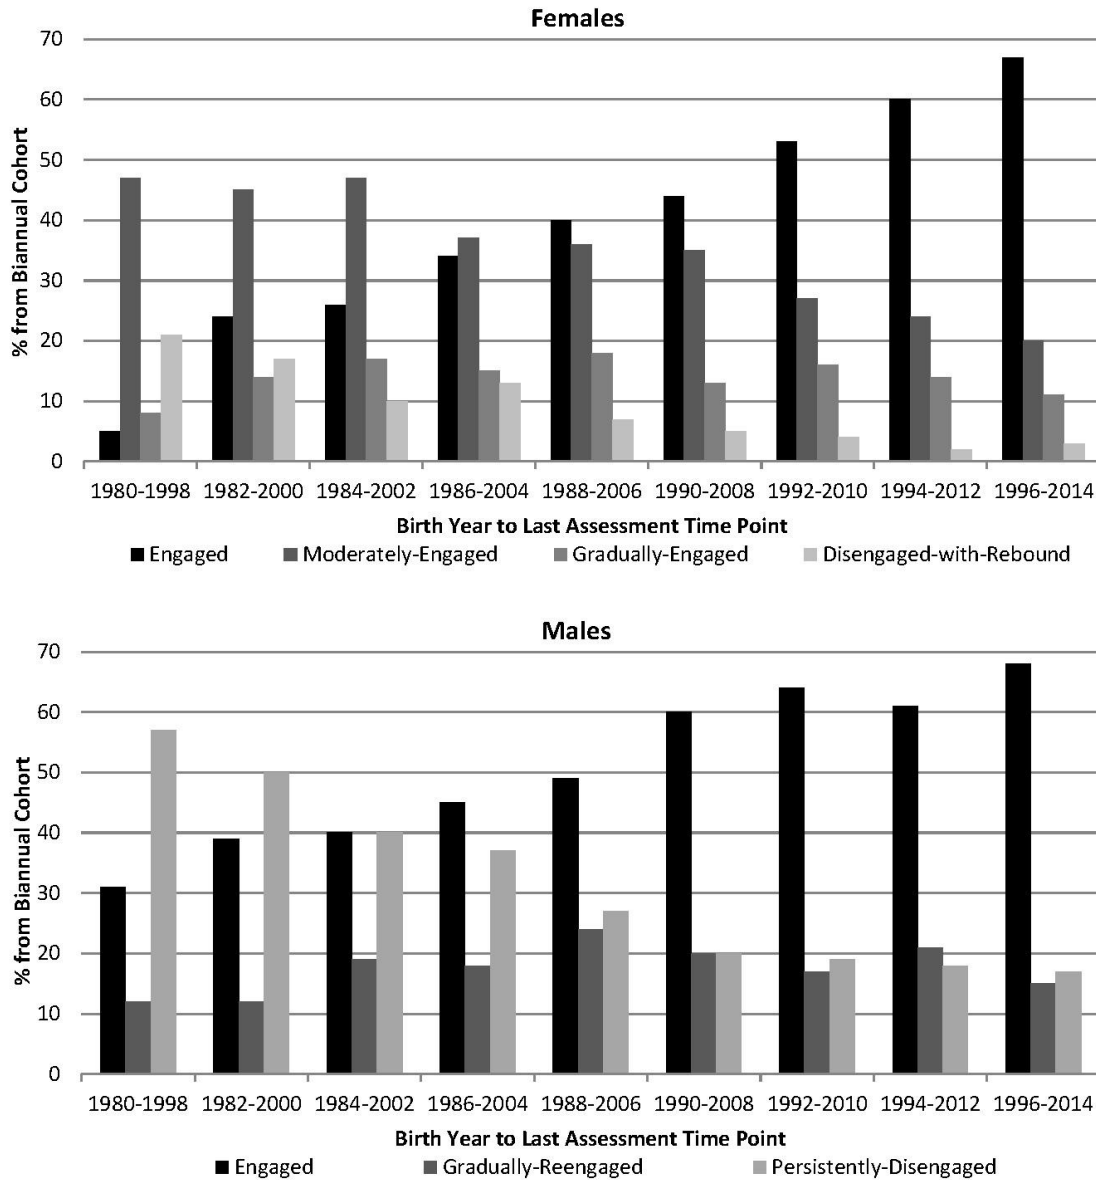

*Note:* Multinomial logistic regression analyses stratified by sex demonstrates change in distribution in WCU class membership across cohorts. For females, multinomial logistic regression results were:  $\chi^2(24)=371.35, p<0.001$ ; Nagelkerke Pseudo- $R^2=0.13$ . Females from the second through fifth cohorts were more likely to belong to the Engaged than other classes ( $p<0.05$ ), except for the Gradually-Reengaged class. For males, results were:  $\chi^2(16)=278.12, p<0.001$ ; Nagelkerke Pseudo- $R^2=0.10$ . Males from all cohorts were more likely to belong to the Engaged than the Persistently-Disengaged class ( $p<0.001$ ), except for the second cohort. No differences were observed across cohorts in males' belonging to the Moderately-Engaged than the Engaged class.

**Appendix**  
**Adolescents' Patterns of Well-Care Use Over Time: Who Stays Connected**  
**Van Eck et al.**

**Appendix Table 1.** Class Enumeration of Sex Specific Longitudinal Latent Class Models of Adolescents' Well-Care Use

| Classes for       | df | LL        | BIC      | BIC-SSA  | AIC      | LRT            |                  | BLRT           |                  | Entropy | Smallest class |      |
|-------------------|----|-----------|----------|----------|----------|----------------|------------------|----------------|------------------|---------|----------------|------|
|                   |    |           |          |          |          | $\Delta 2x$ LL | <i>p</i>         | $\Delta 2x$ LL | <i>p</i>         |         | <i>N</i>       | %    |
| Females (N=3,074) |    |           |          |          |          |                |                  |                |                  |         |                |      |
| 2                 | 21 | -11901.05 | 23970.74 | 23904.02 | 23844.10 | 972.21         | <b>&lt;0.001</b> | 980.86         | <b>&lt;0.001</b> | 0.510   | 1,399          | 41.5 |
| 3                 | 35 | -11869.98 | 24021.04 | 23909.83 | 23809.96 | 61.60          | 0.500            | 62.14          | <b>&lt;0.001</b> | 0.404   | 471            | 14.0 |
| 4                 | 49 | -11842.75 | 24079.01 | 23923.31 | 23783.50 | 53.98          | 0.060            | 54.46          | <b>&lt;0.001</b> | 0.432   | 326            | 9.7  |
| 5                 | 63 | -11821.65 | 24149.23 | 23940.05 | 23769.29 | 41.84          | 0.240            | 42.21          | 0.090            | 0.479   | 295            | 8.7  |
| 6                 | 77 | -11806.54 | 24231.45 | 23986.79 | 23767.08 | 29.94          | 0.715            | 30.21          | 1.000            | 0.495   | 101            | 3.0  |
| Males (N=3,138)   |    |           |          |          |          |                |                  |                |                  |         |                |      |
| 2                 | 21 | -12269.85 | 24708.78 | 24642.05 | 24581.70 | 1008.19        | <b>&lt;0.001</b> | 1017.14        | <b>&lt;0.001</b> | 0.506   | 1,308          | 41.7 |
| 3                 | 35 | -12219.48 | 24720.76 | 24610.00 | 24508.96 | 99.85          | <b>0.0002</b>    | 100.73         | <b>&lt;0.001</b> | 0.452   | 553            | 17.6 |
| 4                 | 49 | -12190.45 | 24775.42 | 24619.72 | 24478.90 | 57.56          | 0.129            | 58.07          | <b>&lt;0.001</b> | 0.466   | 279            | 8.9  |
| 5                 | 63 | -12165.02 | 24837.27 | 24637.18 | 24456.03 | 50.42          | 0.460            | 50.87          | <b>0.013</b>     | 0.495   | 103            | 3.3  |
| 6                 | 77 | -12141.65 | 24903.24 | 24658.59 | 24437.29 | 46.33          | 0.370            | 46.74          | <b>0.013</b>     | 0.534   | 82             | 2.6  |

*Note:* Boldface indicates statistical significance ( $p < 0.05$ ). Model fit was identified by comparing goodness-of-fit indices (i.e., BIC, BIC-SSA, and AIC)<sup>29</sup> using LRT<sup>30</sup> and BLRT.<sup>31</sup> Model Entropy represents a standardized value of classification accuracy based on model estimated posterior probabilities and based on limiting case membership to only 1 class. It has been found not to contribute reliably to model selection.<sup>25</sup> Class separation and homogeneity of class are also based on posterior probability. The former refers to people from different classes having the same response patterns; the latter refers to people within the same class having the same response pattern. Models included covariates of cohort, race/ethnicity, mother's education at birth and health insurance at age 5 years. Fit statistics with and without covariates supported models with the same number of classes.

AIC, Akaike Information Criterion; BIC, Bayesian Information Criterion; BIC-SSA, BIC-sample size adjusted; LRT, Vuong–Lo–Mendell–Rubin log likelihood ratio test; BLRT, bootstrapped LRT; df, degrees of freedom; LL, log likelihood.

**Appendix**  
**Adolescents' Patterns of Well-Care Use Over Time: Who Stays Connected**  
**Van Eck et al.**

**Appendix Table 2.** Time-Varying Insurance as a Covariate on Well-Care Use in Longitudinal Latent Class Models of Adolescents' Well-Care Use by Sex

| Age of WCU assessment | Time-varying insurance |                         |              |                   |                         |             |
|-----------------------|------------------------|-------------------------|--------------|-------------------|-------------------------|-------------|
|                       | n (%)                  | Females                 |              | n (%)             | Males                   |             |
|                       |                        | $\beta$ (SE)            | OR           |                   | $\beta$ (SE)            | OR          |
| 5 years old           | 2,726 (89)             | 0.24 (0.14)             | 1.27         | <b>2,781 (89)</b> | <b>0.45 (0.13)**</b>    | <b>1.58</b> |
| 7 years old           | 2,579 (84)             | -0.001 (0.001)          | 0.99         | 2,616 (83)        | 0.00 (0.001)            | 1.00        |
| 9 years old           | 2,516 (82)             | <b>0.55 (0.16)**</b>    | <b>1.74</b>  | 2,557 (82)        | -0.001 (0.001)          | 1.00        |
| 11 years old          | 2,521 (82)             | <b>-0.005 (0.001)**</b> | <b>0.995</b> | <b>2,519 (80)</b> | <b>0.65 (0.16)**</b>    | <b>1.91</b> |
| 13 years old          | 2,416 (79)             | <b>-0.005 (0.001)**</b> | <b>0.995</b> | <b>2,491 (79)</b> | <b>-0.005 (0.001)**</b> | <b>1.00</b> |
| 15 years old          | 2,280 (74)             | <b>0.42 (0.17)**</b>    | <b>1.51</b>  | <b>2,365 (75)</b> | <b>0.81 (0.19)**</b>    | <b>2.24</b> |
| 17 years old          | 2,472 (80)             | -0.001 (0.001)          | 0.99         | 2,456 (78)        | -0.001 (0.001)          | 1.00        |

*Note:* Boldface indicates statistical significance (\* $p < 0.05$ ; \*\* $p < 0.005$ ). Longitudinal latent class analyses with well-care use by sex were estimated where insurance status was included as a time-varying covariate. Fit statistics were similar to models with insurance status as invariant and measured at age 5 years (Females: BIC=24101.54, AIC=23781.54, LRT  $\chi^2=54.45$ , LRT  $p=0.04$ , BLRT  $\chi^2=53.92$ , BLRT  $p < 0.001$ , entropy=0.48; Males: BIC=24723.73, AIC=24481.67, LRT  $\chi^2=94.91$ , LRT  $p < 0.001$ , BLRT  $\chi^2=95.81$ , BLRT  $p < 0.001$ , entropy=0.44).

AIC, Akaike Information Criterion; BIC, Bayesian Information Criterion; LRT, Vuong–Lo–Mendell–Rubin log likelihood ratio test; BLRT, bootstrapped LRT; df, degrees of freedom; LL, log likelihood.
